# Supplementary material for: Clinicoserological features of antisynthetase syndrome (ASyS)-associated interstitial lung disease presenting to respiratory services: comparison with idiopathic pulmonary fibrosis and ASyS diagnosed in rheumatology services
Source: HighWire-hosted journal article supplement (doi:10.1136/bmjresp-2020-000829), 2021-01-01
Supplement: bmjresp-2020-000829supp001_data_supplement.pdf [file bmjresp-2020-000829supp001_data_supplement.pdf]

## Supplementary data

|                  | Jo1 (n=19) | PL7 (n=6) | PL12 (n=4) | OJ (n=1) | EJ (n=2) | KS (n=2) |
|------------------|------------|-----------|------------|----------|----------|----------|
| cNSIP            | 7          | 1         | 3          | 0        | 1        | 1        |
| fNSIP            | 10         | 7         | 4          | 1        | 1        | 0        |
| OP               | 8          | 2         | 2          | 0        | 0        | 0        |
| cNSIP/OP overlap | 6          | 3         | 2          | 0        | 0        | 0        |
| fNSIP/OP overlap | 3          | 2         | 0          | 0        | 1        | 0        |
| fNSIP/UIP        | 0          | 0         | 0          | 0        | 1        | 0        |
| DAD              | 1          | 0         | 0          | 0        | 0        | 0        |
| Definite UIP     | 1          | 0         | 1          | 0        | 0        | 1        |
| Indeterminate    | 1          | 0         | 0          | 0        | 0        | 0        |

**Supplementary Table 1. HRCT pattern of interstitial lung disease (ILD) at presentation of anti-synthetase patients (ASyS) as determined by auto-antibody expression (n=66 available with imaging).** The most common radiological pattern of ILD associated with ASyS was non-specific interstitial pneumonia (fibrotic NSIP (fNSIP) and cellular NSIP (cNSIP)), although patients also presented organising pneumonia (OP), usual interstitial pneumonia (UIP) or overlap radiological patterns. One patient presented acutely with an acute interstitial pneumonia and a radiological pattern consistent with diffuse alveolar damage (DAD).

|                         | Respiratory ASyS       | Rheumatology ASyS      | P value |
|-------------------------|------------------------|------------------------|---------|
| <b>FVC (actual)</b>     | 2.54 (1.82-3.08), n=52 | 2.53 (2.0-3.57), n=23  | 0.308   |
| <b>FVC % predicted</b>  | 70 (62-83), n=52       | 76 (67-89), n=23       | 0.289   |
| <b>TLco</b>             | 4.35 (3.33-5.84), n=40 | 4.05 (3.18-5.70), n=23 | 0.540   |
| <b>TLco % predicted</b> | 50 (44-63), n=43       | 49(39-69), n=23        | 0.354   |

**Supplementary Table 2. Lung function in anti-synthetase patients (ASyS) presenting to respiratory and rheumatology services.** There was no significant difference in the baseline FVC and TLco of patients presenting to respiratory and rheumatology services ( $p>0.05$ , Mann Whitney U test). Abbreviations: FVC, forced vital capacity; TLco, transfer factor for carbon monoxide; % percentage; n, number.

|                | Respiratory                                                 | Rheumatology               | P value       |
|----------------|-------------------------------------------------------------|----------------------------|---------------|
| <b>Non-Jo1</b> | 34<br>PL7 (n=15), PL12 (n=12), EJ (n=4), KS (n=2), OJ (n=1) | 4<br>PL12 (n=3), PL7 (n=1) | <b>0.0027</b> |
| <b>Jo1</b>     | 18                                                          | 19                         |               |

**Supplementary Table 3. Detection of Jo1 vs non-Jo1 antibodies in anti-synthetase patients initially presenting to respiratory and rheumatology services.** Patients presenting to respiratory services were more likely to express non-Jo1 antibodies compared to those presenting to rheumatology services (Fisher's exact test,  $p < 0.05$ ).

| Outcome of 1 year FVC % predicted | Jo1 antibody status | Non-Jo1 antibody status |
|-----------------------------------|---------------------|-------------------------|
| Stable                            | 19                  | 19                      |
| Improvement                       | 9                   | 9                       |
| Progression                       | 2                   | 3                       |

**Supplementary Table 4: Outcome in Forced vital capacity at 1 year follow up ( % predicted), comparing those with Jo1 versus non-Jo1 antibodies.** There was no significant difference in the number of patients demonstrating stability, improvement or decline in lung function between groups (Chi squared testing  $p > 0.05$ ,  $n = 61$ ).
